# Supplementary material
Source: Springer Nature journal article supplement (https://www.springermedizin.de/resource/supplementary/12913_2009_1285_MOESM1_ESM.pdf/9527770)

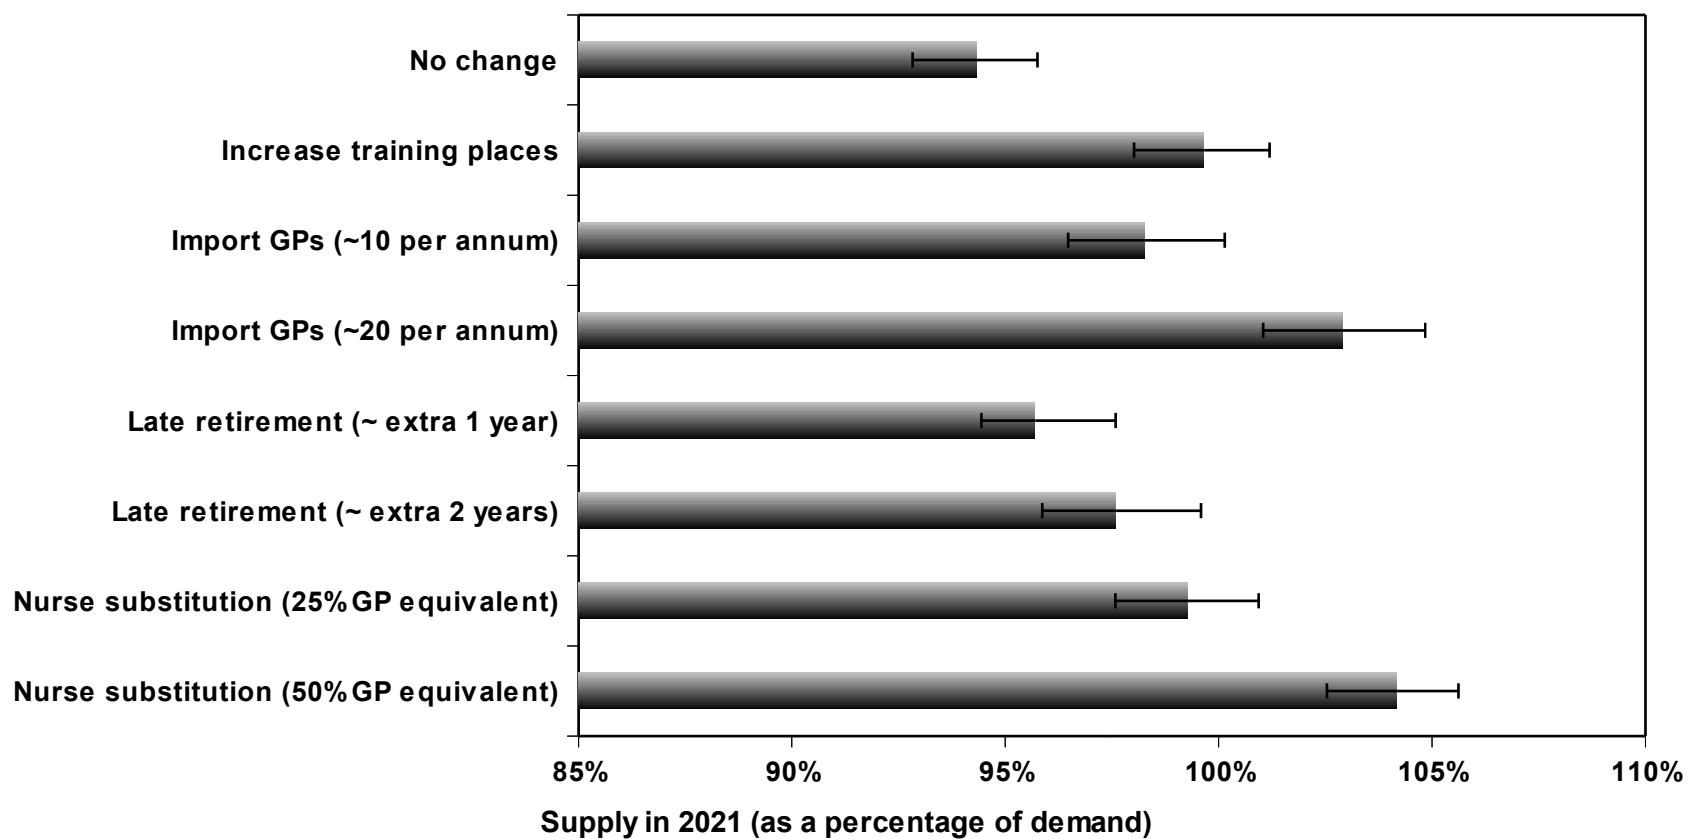

Supplement: MOESM1 [file 9527770]
